# Supplementary material for: Hepcidin and Iron Deficiency in Women One Year after Sleeve Gastrectomy: A Prospective Cohort Study
Source: MDPI journal article supplement (doi:10.3390/nu13082516), 2021-07-23
Supplement: s1 [file s1]

Supplementary data Figure S1

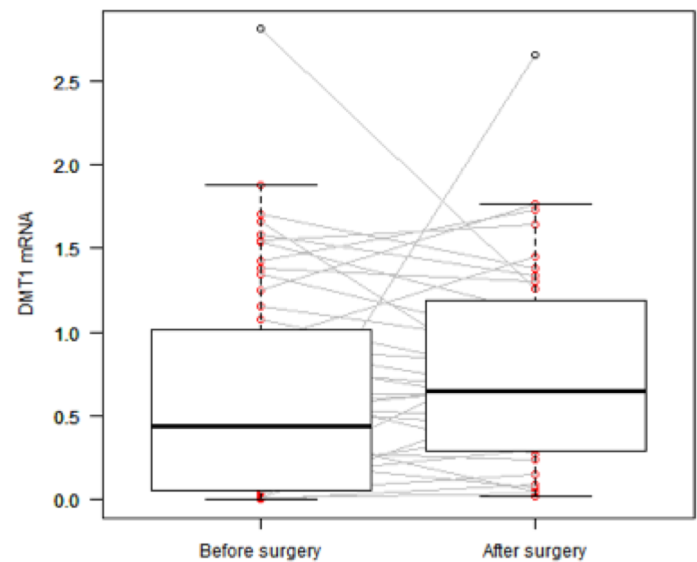

(a)

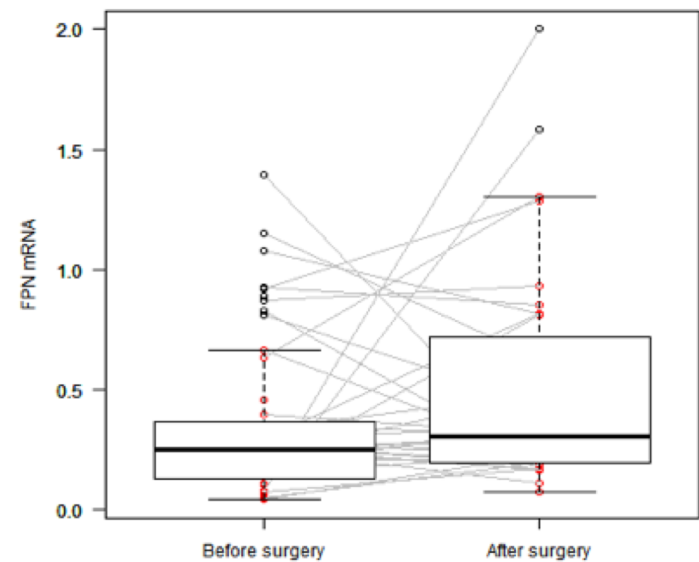

(b)

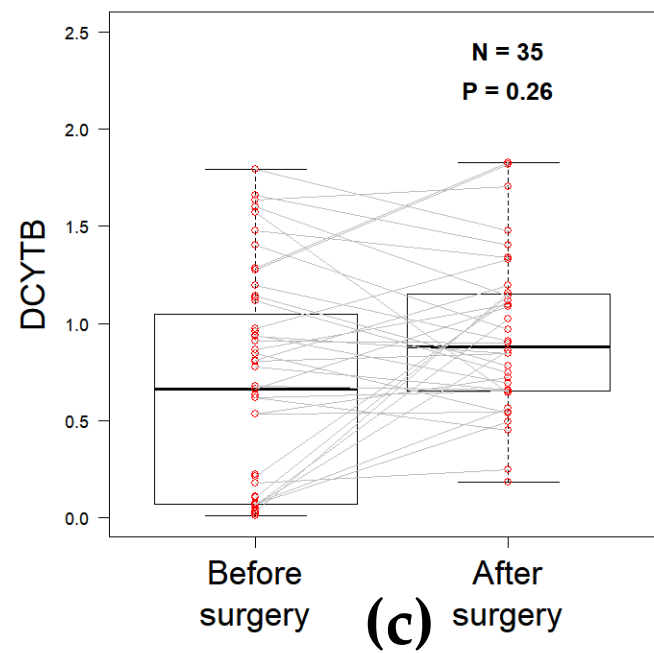

(c)

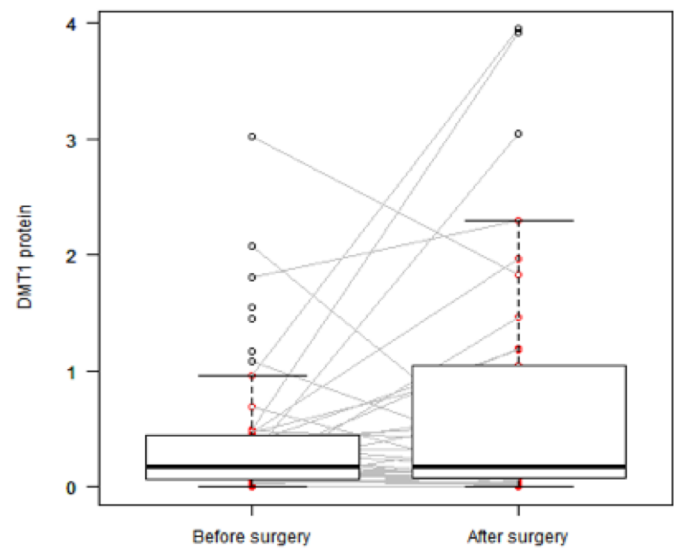

(d)

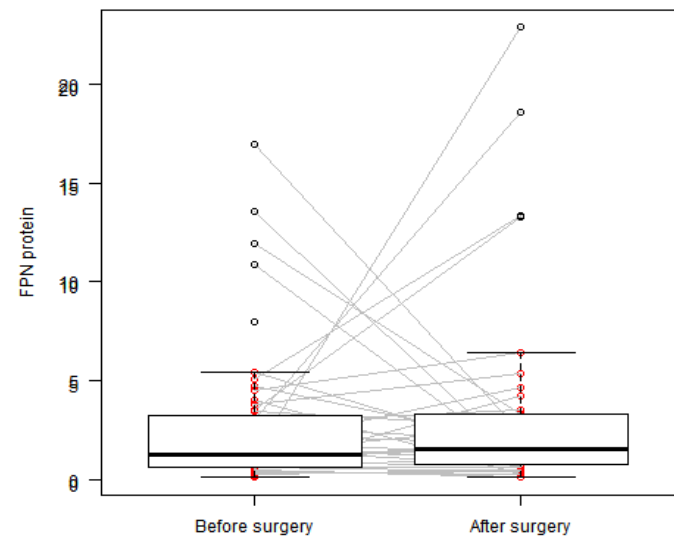

(e)

Table S1; Population N = 35

|                                   | Before surgery  | After surgery  | p-value                       | N  |
|-----------------------------------|-----------------|----------------|-------------------------------|----|
| Hemoglobin (g/dL)                 | 12.84 (1.17)    | 12.61 (0.96)   | 0.61                          | 28 |
| Red blood cells (T/L)             | 4.45 (0.36)     | 4.4 (0.4)      | 0.59                          | 27 |
| Hematocrit (%)                    | 38.45 (3.03)    | 38.32 (3.2)    | 1.00                          | 30 |
| MCV (fL)                          | 85.34 (5)       | 86.7 (6.13)    | <b>5.64 x 10<sup>-4</sup></b> | 28 |
| Platelets (G/L)                   | 256.58 (46.57)  | 243.07 (56.46) | 0.33                          | 26 |
| Leucocytes (G/L)                  | 6.19 (1.53)     | 5.52 (1.61)    | <b>9.80 x 10<sup>-5</sup></b> | 27 |
| Folate (µg/L)                     | 6.56 (5.3)      | 8.95 (5.65)    | <b>4.78 x 10<sup>-3</sup></b> | 31 |
| Vitamin B12 (ng/L)                | 438.12 (167.59) | 394.7 (171.17) | 0.02                          | 31 |
| ASAT (U/L)                        | 21.12 (6.85)    | 19.48 (11.26)  | 0.36                          | 31 |
| ALAT (U/L)                        | 28.67 (11.21)   | 25.7 (15.79)   | 0.38                          | 31 |
| Gamma GT (U/L)                    | 35.12 (14.37)   | 35.24 (38.47)  | 0.69                          | 31 |
| ALP (U/100mL)                     | 74.82 (21.42)   | 69.75 (23.91)  | <b>1.66 x 10<sup>-4</sup></b> | 30 |
| Total Bilirubin (µmol/L)          | 6.93 (3.63)     | 10.23 (5.09)   | <b>1.28 x 10<sup>-4</sup></b> | 31 |
| Ferritin (µg/L)                   | 72.67 (64.83)   | 77.12 (70.31)  | 0.52                          | 31 |
| Transferrin (g/L)                 | 2.47 (0.32)     | 2.41 (0.39)    | 0.44                          | 31 |
| Transferrin Iron Binding Capacity | 60.62 (8.32)    | 60.26 (9.7)    | 0.87                          | 31 |
| Transferrin Saturation (%)        | 25.74 (7.77)    | 32.77 (11.63)  | <b>3.88 x 10<sup>-3</sup></b> | 31 |
| Soluble Transferrin Receptor      | 1.4 (0.37)      | 1.24 (0.33)    | <b>2.53 x 10<sup>-3</sup></b> | 31 |
| Ceruloplasmin (g/L)               | 0.29 (0.06)     | 0.27 (0.07)    | <b>0.04</b>                   | 28 |
| Haptoglobin (g/L)                 | 1.12 (0.43)     | 0.89 (0.37)    | <b>8.82 x 10<sup>-5</sup></b> | 30 |
